# Supplementary material for: Geochemical mass-balance, weathering and evolution of soils formed on a Quaternaryage basaltic toposequences
Source: Copernicus journal article supplement (doi:10.5194/se-2016-105), 2016-08-23
Supplement: Supplementary file [file se-2016-105-RC2-supplement.pdf]

Dear Editor,

In this paper, characteristics of 4 soil profiles on Quaternary-age basaltic toposequence of Middle Black Sea region of Turkey. It can provide contributions to scientific literature and data were well-organized. This manuscript may be needs minor revisions. In present form of this paper after minor revision to accept publication in your journal as a research paper.

- 1) A reference about meteorological data should be provided in Section 2.3.
- 2) Wording errors in Table 3 should be corrected. (Correct form is  $\text{SiO}_2$ ,  $\text{Al}_2\text{O}_3$ ,  $\text{Fe}_2\text{O}_3$ ,  $\text{Na}_2\text{O}$ ,  $\text{K}_2\text{O}$ ,  $\text{TiO}_2$ ,  $\text{P}_2\text{O}_5$ ,  $\text{Cr}_2\text{O}_3$ ).
- 3) What does the image D of Figure 4 represent?
- 4) The date for Moore and Reynolds in section 3.6 and the data provided in references are different. Correct the date in references.
- 5) The following literatures were listed in reference section even they were referred in paper. Include them in reference section (Middleburg et al., 1988; Dengiz et al., 2013; Bohn et al., 1985; Sommer et al., 2008; Jong et al., 2000; Dengiz, 2007; Brimhall et al., 1988; 1991, Yair, 1990; Dahlgren et al., 1997; Canton, 2003; Dengiz, 2010; Kreznor et al., (1989); Rezaei and Gilkes (2005); Dengiz et al., (2013); FAO/ISRIC, 2006; Aksoy (1991); Jianwu et al., (2014); Souri et al., 2016; Welch and Ullman, 1993; Moore and Reynolds, 1989; Pettijohn et al., 1987).
- 6) The reference “Buol and Hole, 1961” was not referred in the text.
- 7) The reference “Egli et al. (2008)” was written two times. Delete one of them.

Sincerely yours,
